# Supplementary material
Source: Research Square preprint supplement (doi:10.21203/rs.3.rs-9008242/v1)
Supplement: Supplementary file 1 [file dba5919f74d1d9b448c0d2ea.docx]

**Multimodal Fusion for Predicting Prognosis in Colorectal Cancer Liver Metastases**

**SUPPLEMENTARY MATERIAL**

**Haichao Zou1†, Haiyang Xie1†,** Guoxin Liang1, Shanshan Luo1,3, Yumeng Guo2*, Xinxin He1,3*

1Division of Colorectal and Anal Surgery, Department of Gastrointestinal Surgery, Guangxi Medical University Cancer Hospital, Nanning, China.

2Department of Digestive Diseases, Huashan Hospital, Fudan University, Shanghai 200040, China.

3Guangxi Clinical Research Center for Colorectal Cancer, Nanning, China.

**†** These authors contributed equally to this work.

*Corresponding author: Xinxin He, Division of Colorectal and Anal Surgery, Department of Gastrointestinal Surgery, Guangxi Medical University Cancer Hospital, No.50, Liangyu Avenue, Nanning, Guangxi, 530201, China, Phone: 86-771-5644230, FAX: 86-771-5644230, e-mail: [hexinxin@gxmu.edu.cn](mailto:hexinxin@gxmu.edu.cn); Yumeng Guo, Department of Digestive Diseases, Huashan Hospital, Fudan University, Shanghai 200040, China. Phone: 86-21-52888235, FAX: 86-21-52888235, email: guoyumeng@fudan.edu.cn.


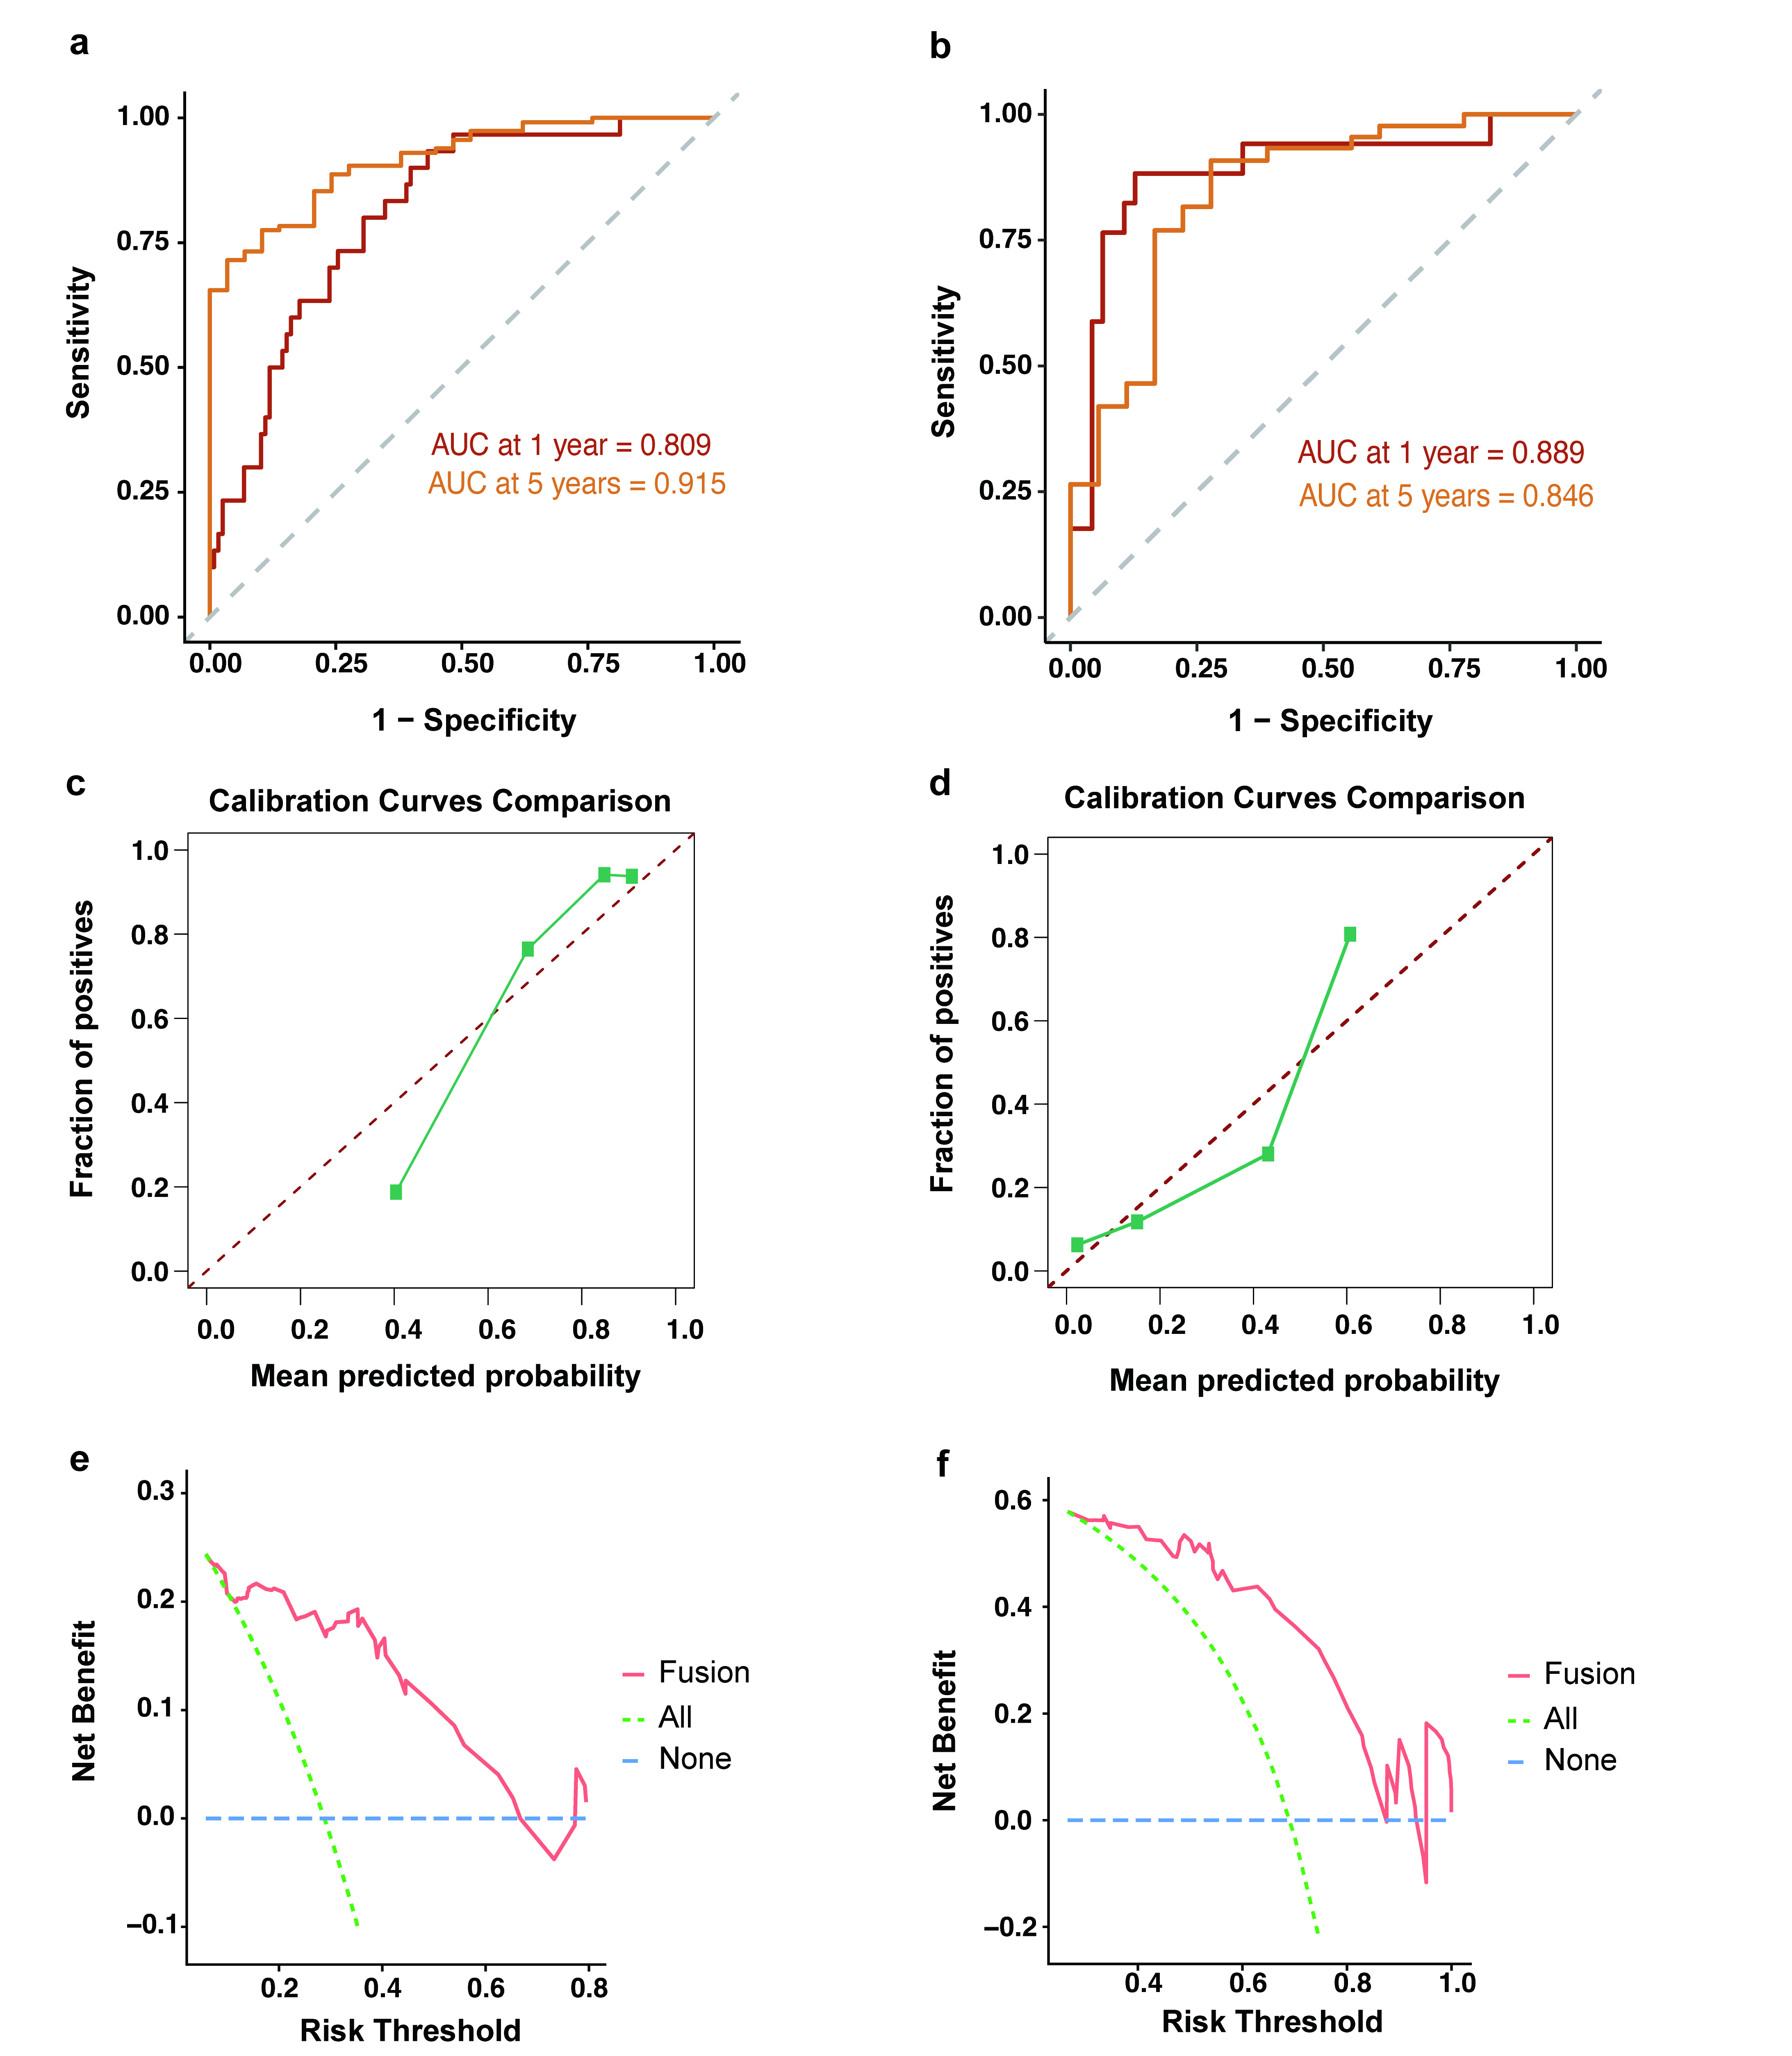


**Figure S1.** Performance evaluation and comparison of the prognostic models. (a, b) Time-dependent ROC curves for 1-year and 5-year in the (a) training and (b) validation cohorts. (c,d) Calibration curves for 1-year and 5-year in the validation cohort. (e,f) DCA for 1-year and 5-year in the validation cohort.
